# Supplementary material for: An injectable collagen/poly(γ-glutamic acid) hydrogel as a scaffold of stem cells and α-lipoic acid for enhanced protection against renal dysfunction
Source: Royal Society of Chemistry journal article supplement (doi:10.1039/c6bm00711b), 2016-12-15
Supplement: c6bm00711b1.pdf [file c6bm00711b1.pdf]

## Supplementary Information

### Injectable collagen/poly( $\gamma$ -glutamic acid) hydrogel as a scaffold of stem cells and $\alpha$ -lipoic acid for enhanced protection against renal dysfunction

Sun-Hee Cho,<sup>‡a</sup> Jung-Ran Noh,<sup>‡b</sup> Mi Young Cho,<sup>a</sup> Min-Jeong Go,<sup>b</sup> Yong-Hoon Kim,<sup>b</sup> Eun Sung Kang,<sup>a</sup> Yong Ho Kim,<sup>a</sup> Chul-Ho Lee<sup>\*b</sup> and Yong Taik Lim<sup>\*a</sup>

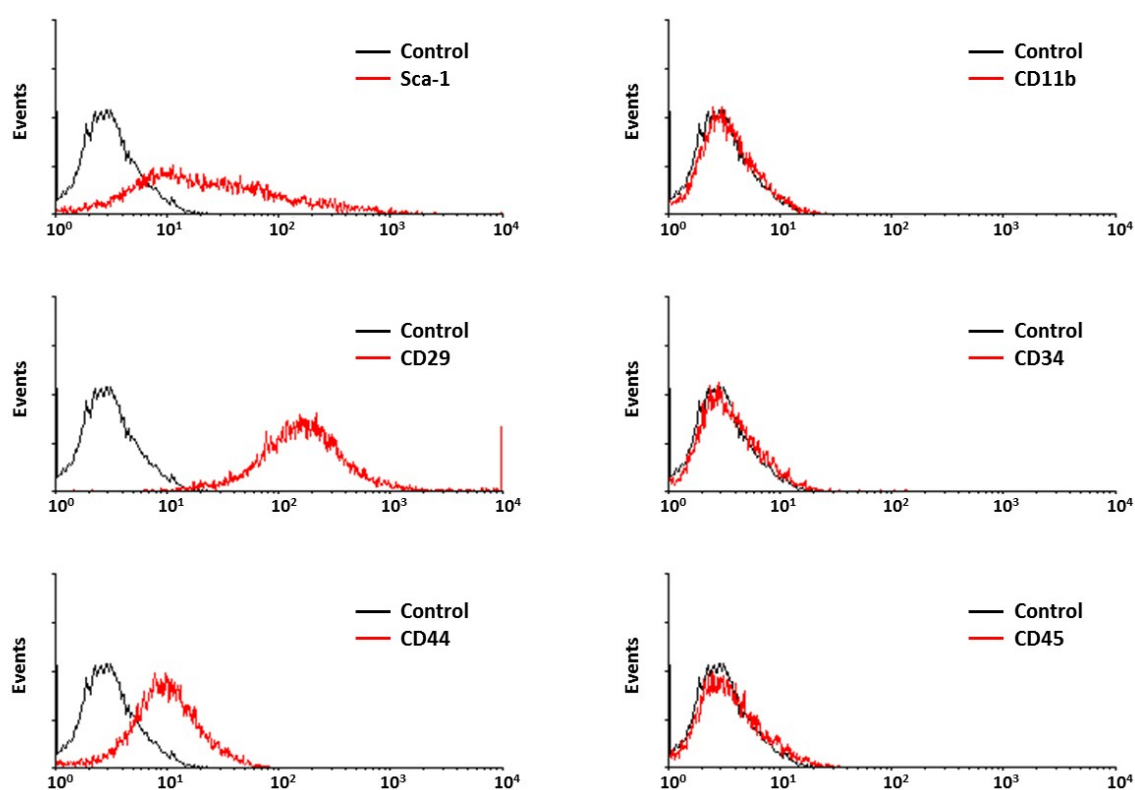

**Figure S1.** Immunophenotype of mMSCs. Flow cytometry analysis of cell surface markers showed that mMSCs were not contaminated by macrophase, leukocyte, and hematopoietic stem cell. (Positive markers : Sca-1, CD29, CD44, negative markers : CD11b, CD34, CD45)

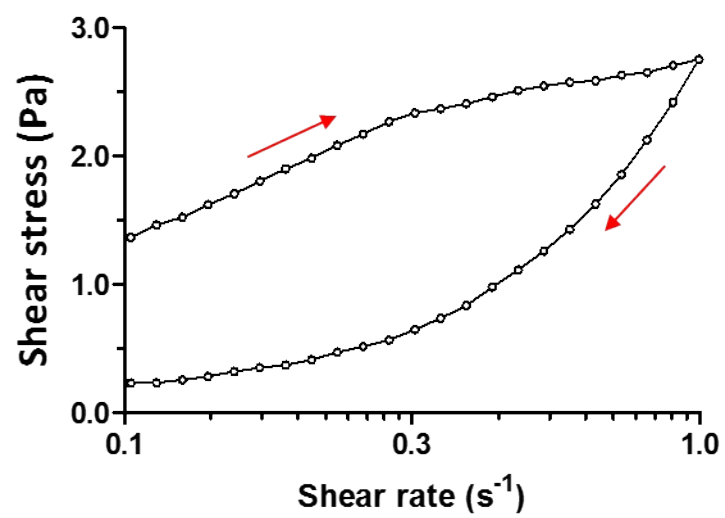

**Figure S2.** Thixotropy behavior of collagen/γ-PGA hydrogel at 37 °C.
